# Supplementary material for: Machine Learning Models for Diagnosis of Parkinson’s Disease Using Multiple Structural Magnetic Resonance Imaging Features
Source: Frontiers journal article supplement (doi:10.3389/fnagi.2022.808520), 2022-04-13
Supplement: Data_Sheet_1.PDF [file Data_Sheet_1.PDF]

## Supplementary figures

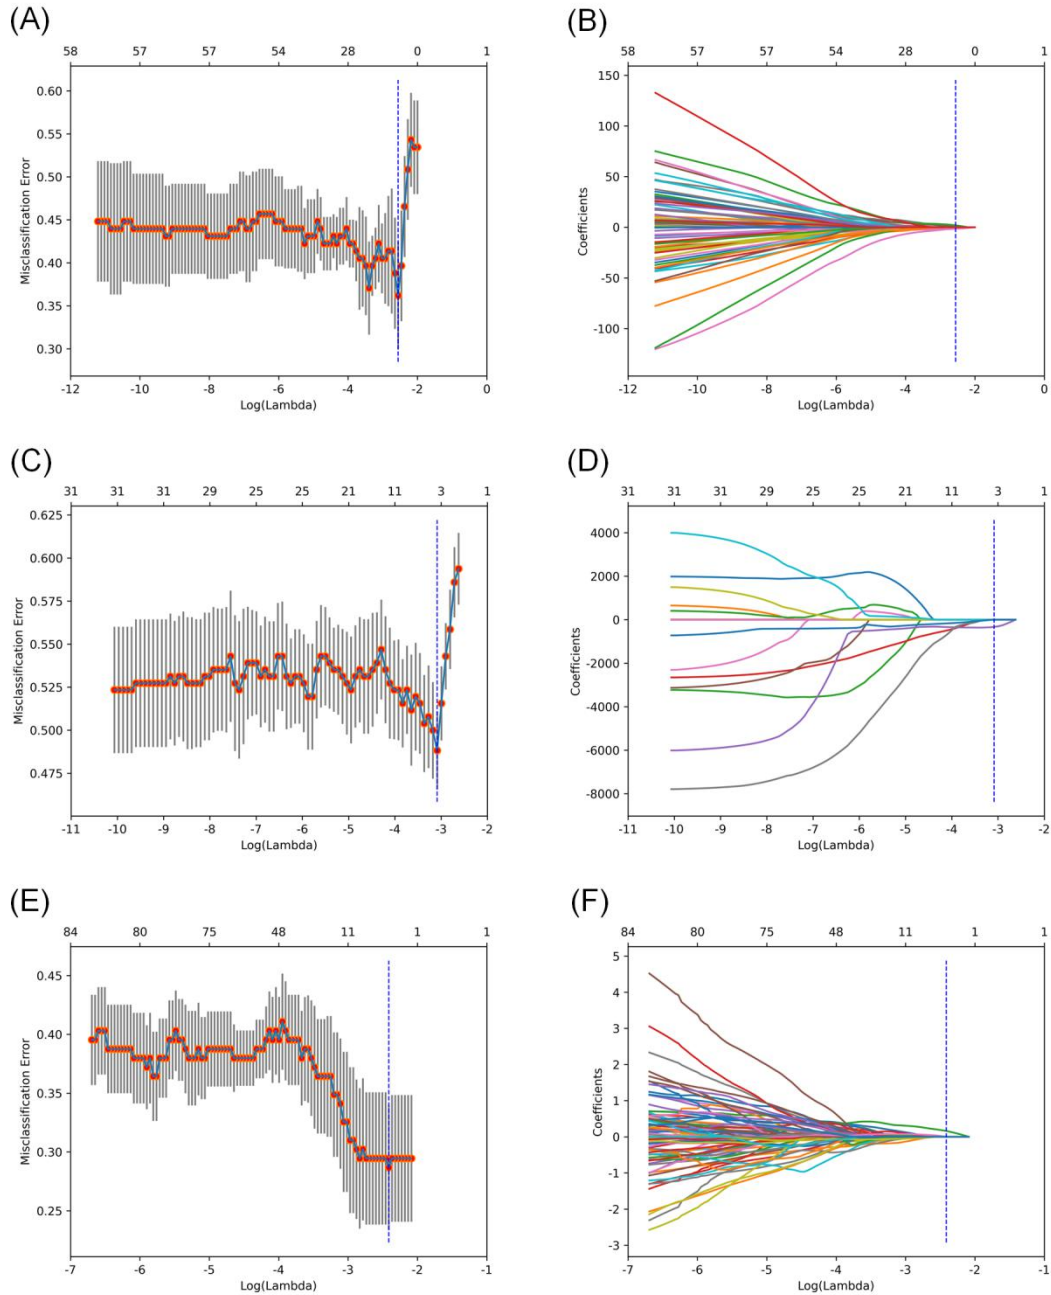

**Supplementary Figure 1.** LASSO regression-based feature selection. The variance threshold approach-based dimensionality reduction profile showed that the optimal  $\log(\lambda)$  values were -2.5576, -3.0871 and -2.4132 for the cerebellar features (A), subcortical features (C) and cortical features (E), respectively. There were 5, 3 and 4 non-zero coefficients against the optimal  $\log(\lambda)$  sequence for the cerebellar features (B), subcortical features (D) and cortical features (F), respectively.

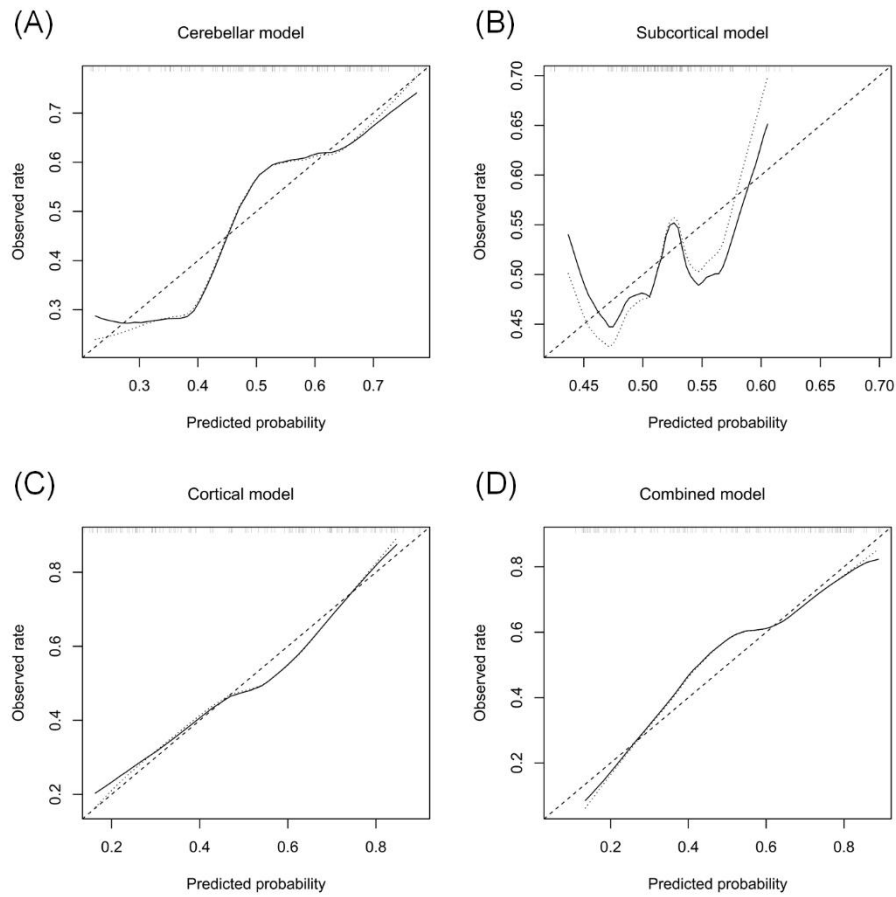

**Supplementary Figure 2.** Calibration curve analysis of the Cerebellar model (A), Subcortical model (B), Cortical model (C) and Combined model (D) in the internal validation dataset.

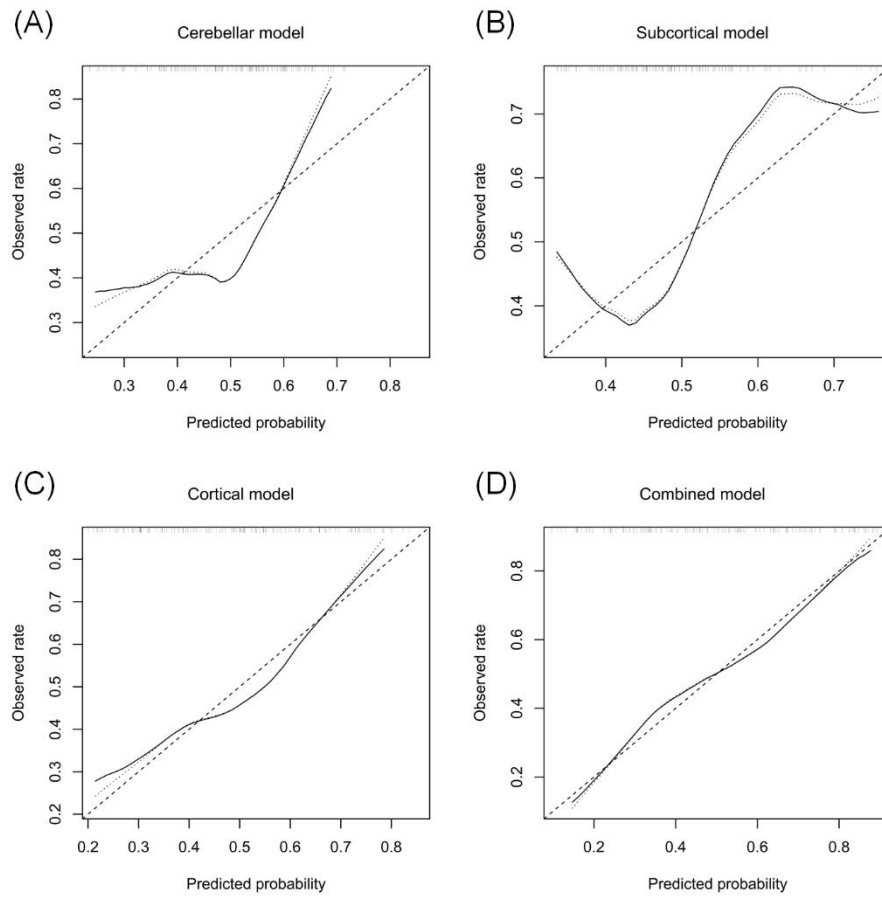

**Supplementary Figure 3.** Calibration curve analysis of the Cerebellar model (A), Subcortical model (B), Cortical model (C) and Combined model (D) in the independent test dataset.
